# Supplementary material for: Self-limiting selective phase separation of graphene oxide and polymer composite solution
Source: Royal Society of Chemistry journal article supplement (doi:10.1039/d4nr04636f), 2025-01-01
Supplement: d4nr04636f1.pdf [file d4nr04636f1.pdf]

# Supporting Information

## Self-limiting Selective Phase Separation of Graphene Oxide and Polymer Composites Solution

*Feifan Chen<sup>1</sup>, Lidan Wang<sup>1</sup>, Kaiwen Li<sup>1</sup>, Rui Guo<sup>1</sup>, Yicong Qing<sup>1</sup>, Chenwei Shen<sup>1</sup>, Yingjun Liu<sup>1,2</sup>,  
Zhen Xu<sup>1,2\*</sup>, and Chao Gao,<sup>1,2\*</sup>*

<sup>1</sup>MOE Key Laboratory of Macromolecular Synthesis and Functionalization, Department of Polymer Science and Engineering, Key Laboratory of Adsorption and Separation Materials & Technologies of Zhejiang Province, Zhejiang University, 38 Zheda Road, Hangzhou 310027, China.

<sup>2</sup>Shanxi-Zheda Institute of Advanced Materials and Chemical Engineering, Taiyuan 030032, China.

\*Corresponding author. Email: zhenxu@zju.edu.cn (Z. X.); chaogao@zju.edu.cn (C. G.).

## Table of contents

- Figure S1.** The state of different polymers dissolved in different solvents.
- Figure S2.** GO stacking process.
- Figure S3.** TEM image of SPS-GO/PS sample.
- Figure S4.** Morphology comparison of SPS-GO/PS sample before and after immersion in EA.
- Figure S5.** The process of PS migration and fusion.
- Figure S6.** Statistic distribution of diameter of PS with different concentration.
- Figure S7.** The CLSM image of SPS-GO/PS.
- Figure S8.** Statistic of maximum cluster area with different  $\alpha_{PS}$  .
- Figure S9.** The method of the calculation of continuous phase ratio.
- Figure S10.** Water contact angle measurement of pure GO, PS, PEO, PVA and CNC.
- Figure S11.** The OM image of GO/PEO.
- Figure S12.** The DLS Intensity-Radius curve of pure GO solution and GO/PEO solution.
- Figure S13.** The DLS Count Rate-Time curve of pure GO solution and GO/PEO solution.
- Figure S14.** Scheme of the continuous SPS-spinning process.
- Figure S15.** Fracture section of homogeneous GO/PEO fibers.
- Figure S16.** TGA of SPS fibers and homogeneous fibers.
- Figure S17.** FTIR of pure GO, SPS fibers and homogeneous fibers.
- Figure S18.** GO/PEO solution precipitated in EA and EA/ethanol.
- Figure S19.** TGA of pure GO, SPS-GO/PEO and Homogeneous-GO/PEO.
- Figure S20.** Tensile curves of homogenous GO/PEO fibers and the SPS fibers.
- Figure S21.** SEM images of SPS-GO/PEO fibers with different type of knots.
- Figure S22.** Stress-strain curves of SPS fibers with different numbers of knots.

**Table S1.** The contact angle difference between different polymers and pure GO.

**Table S2.** The raw data for mechanical testing of homogenous fibers and SPS fibers.

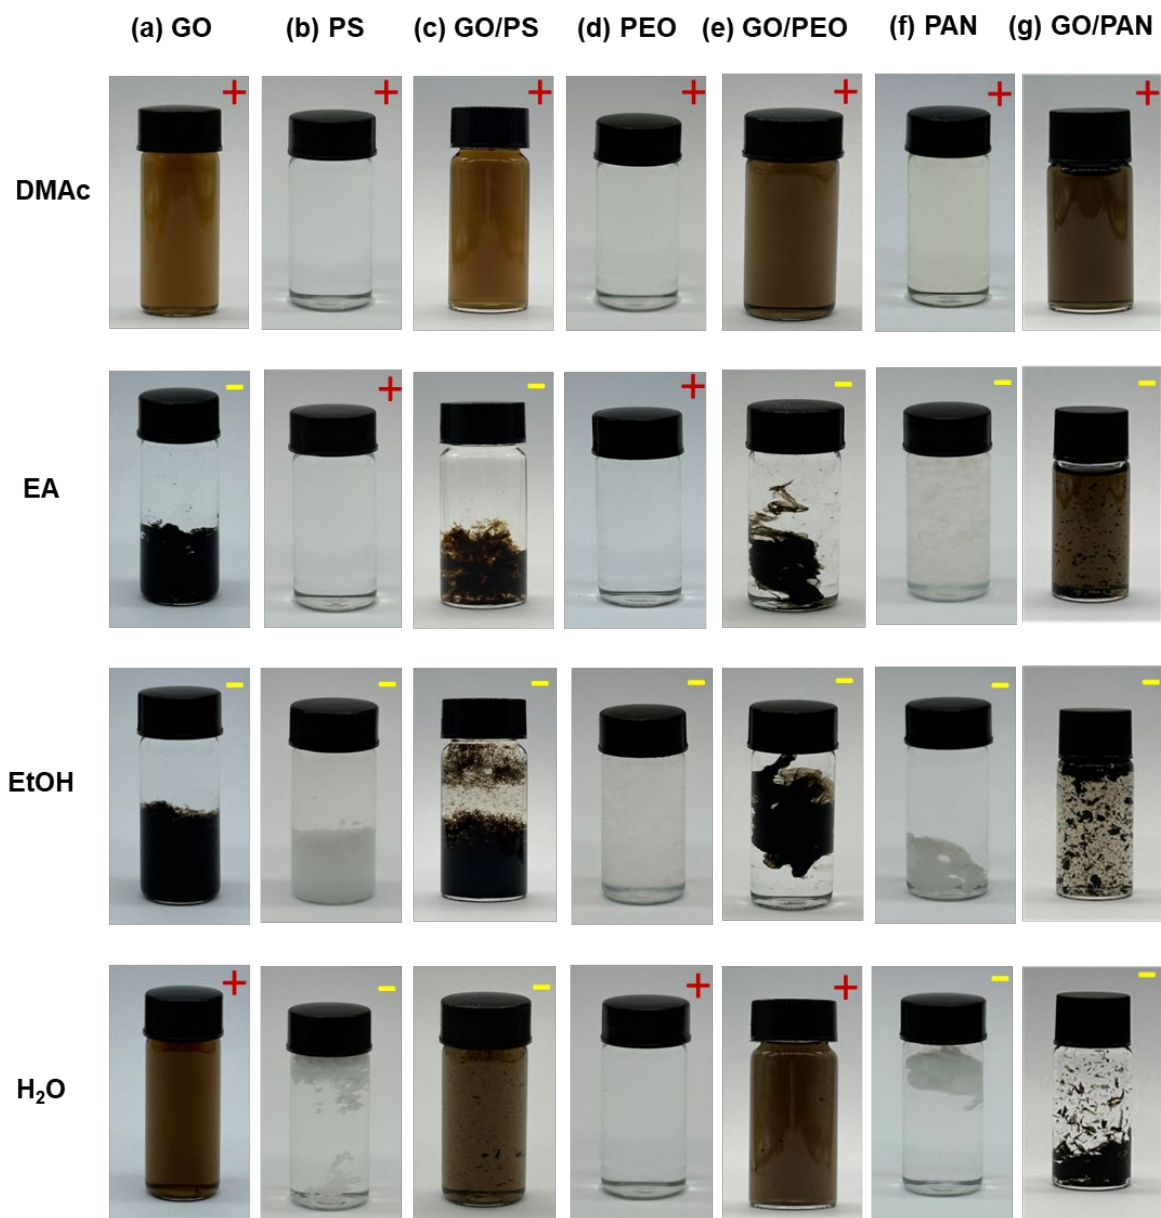

**Figure S1.** The state of different polymers dissolved in different solvents. (a) GO dispersion. (b) PS solution with  $M_w=280$  kDa. (c) GO/PS ( $M_{GO}:M_{PS}=1:1$ ) mixed solution. (d) PEO solution with  $M_w=7900$  kDa. (e) GO/PEO ( $M_{GO}:M_{PEO}=1:1$ ) mixed solution. (f) PAN solution with  $M_w=280$  kDa. (g) GO/PAN ( $M_{GO}:M_{PAN}=1:1$ ) mixed solution. “—”, poor solvent. “+”, good solvent.

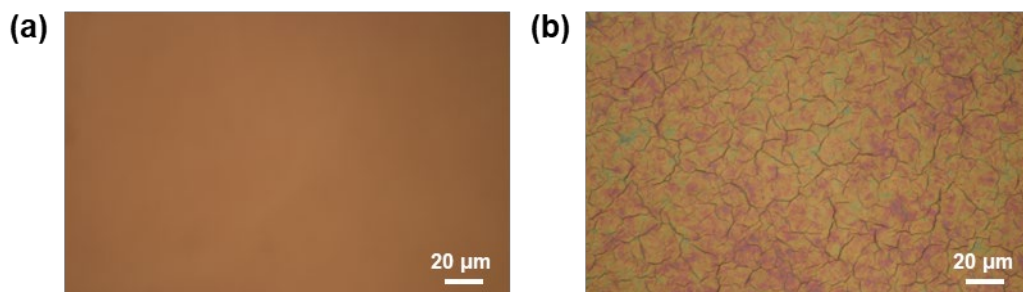

**Figure S2.** GO stacking process. (a) OM image of GO. (b) OM image of GO after immersion in EA.

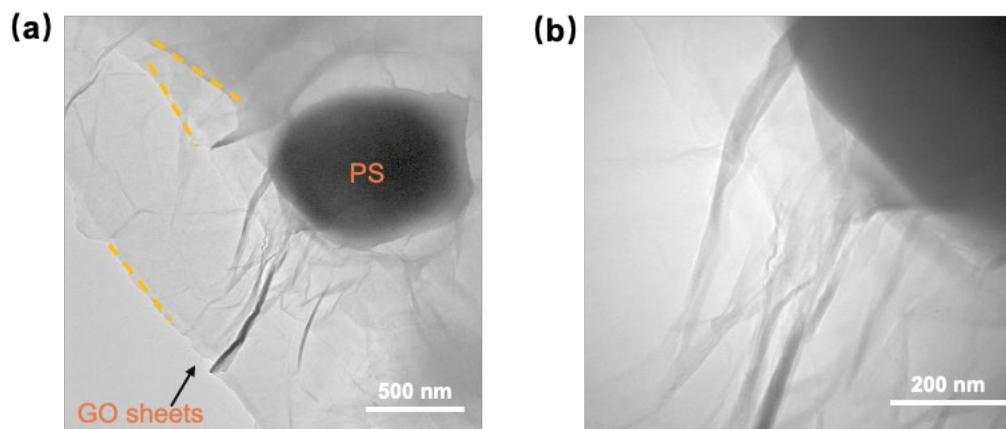

**Figure S3.** TEM image of SPS-GO/PS sample. The black sphere is PS which is covered with GO sheets.

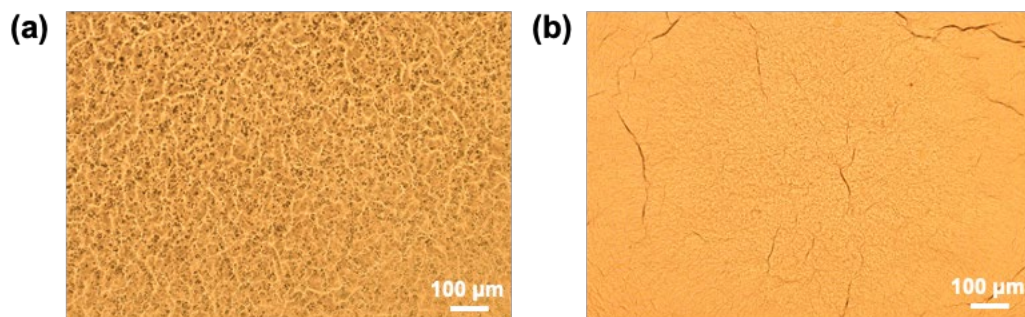

**Figure S4.** Morphology comparison of SPS-GO/PS sample before and after immersion in EA.

(a) OM image of SPS-GO/PS sample before immersion in EA. (b) OM image of SPS-GO/PS sample after immersion in EA.

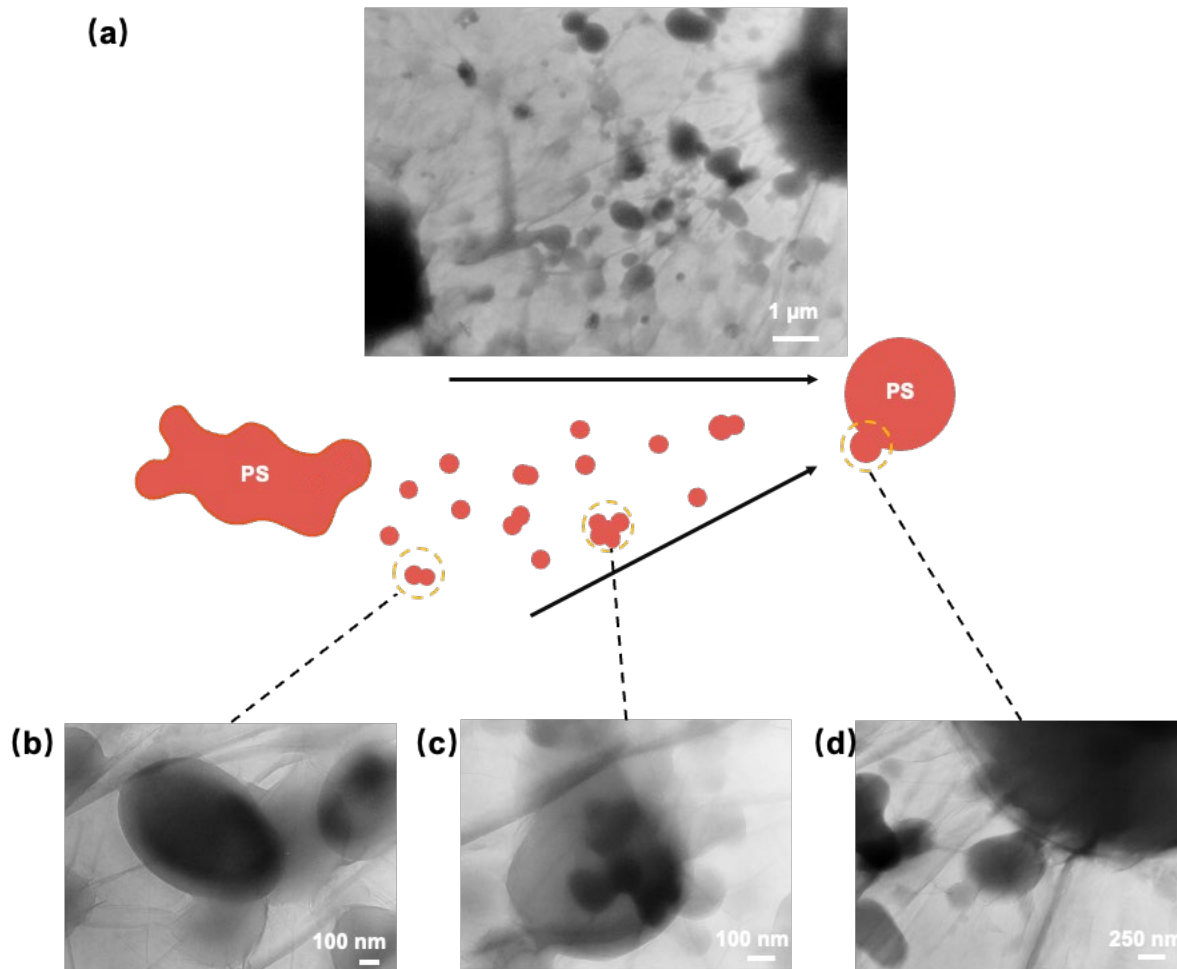

**Figure S5.** The process of PS migration and fusion. PS migrates and converges between layers to form a larger scale PS phase.



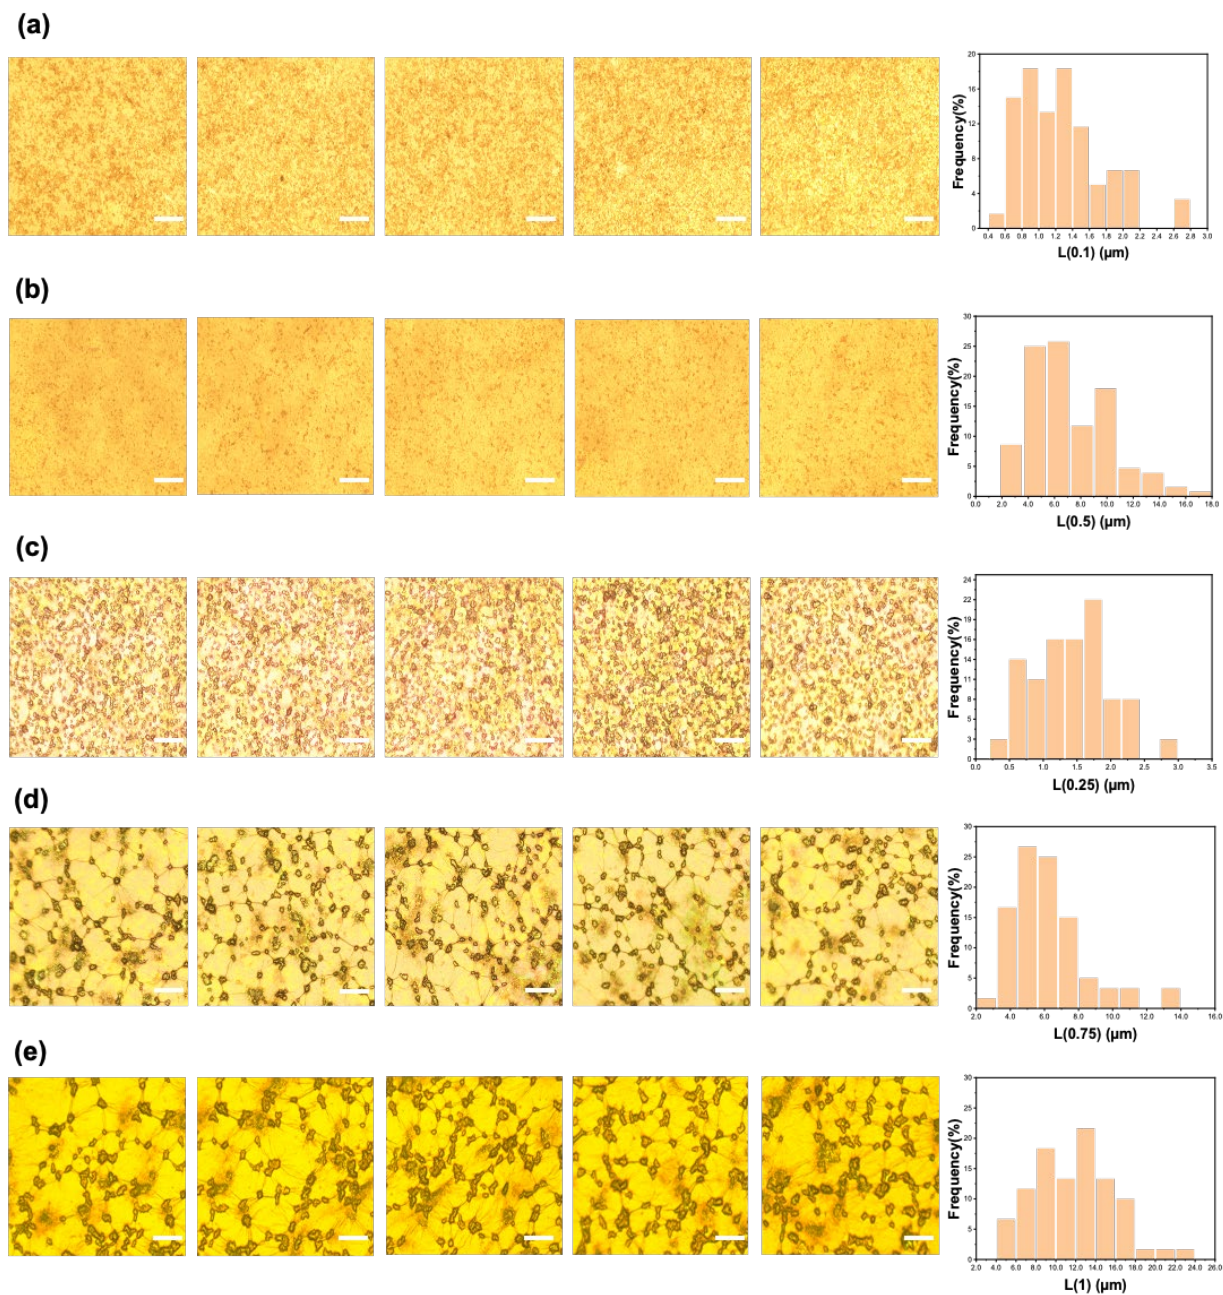

**Figure S6.** Statistic distribution of diameter of PS with different concentration. (a) 0.1%. (b) 0.25%. (c) 0.5%. (d) 0.75%. (e) 1%. Scale bar is 20  $\mu\text{m}$ .

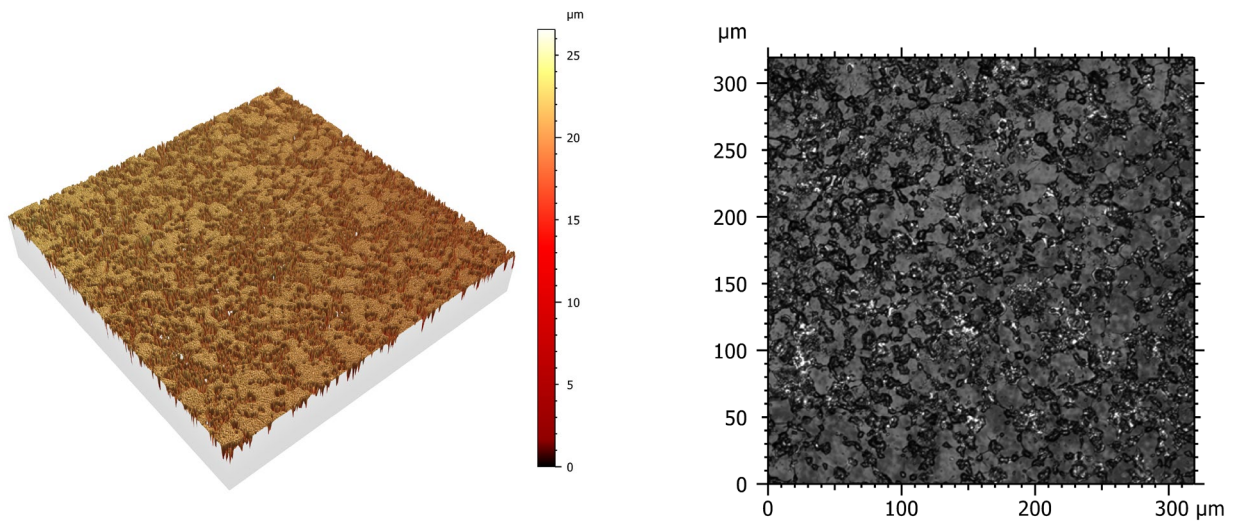

**Figure S7.** The CLSM image of SPS-GO/PS.

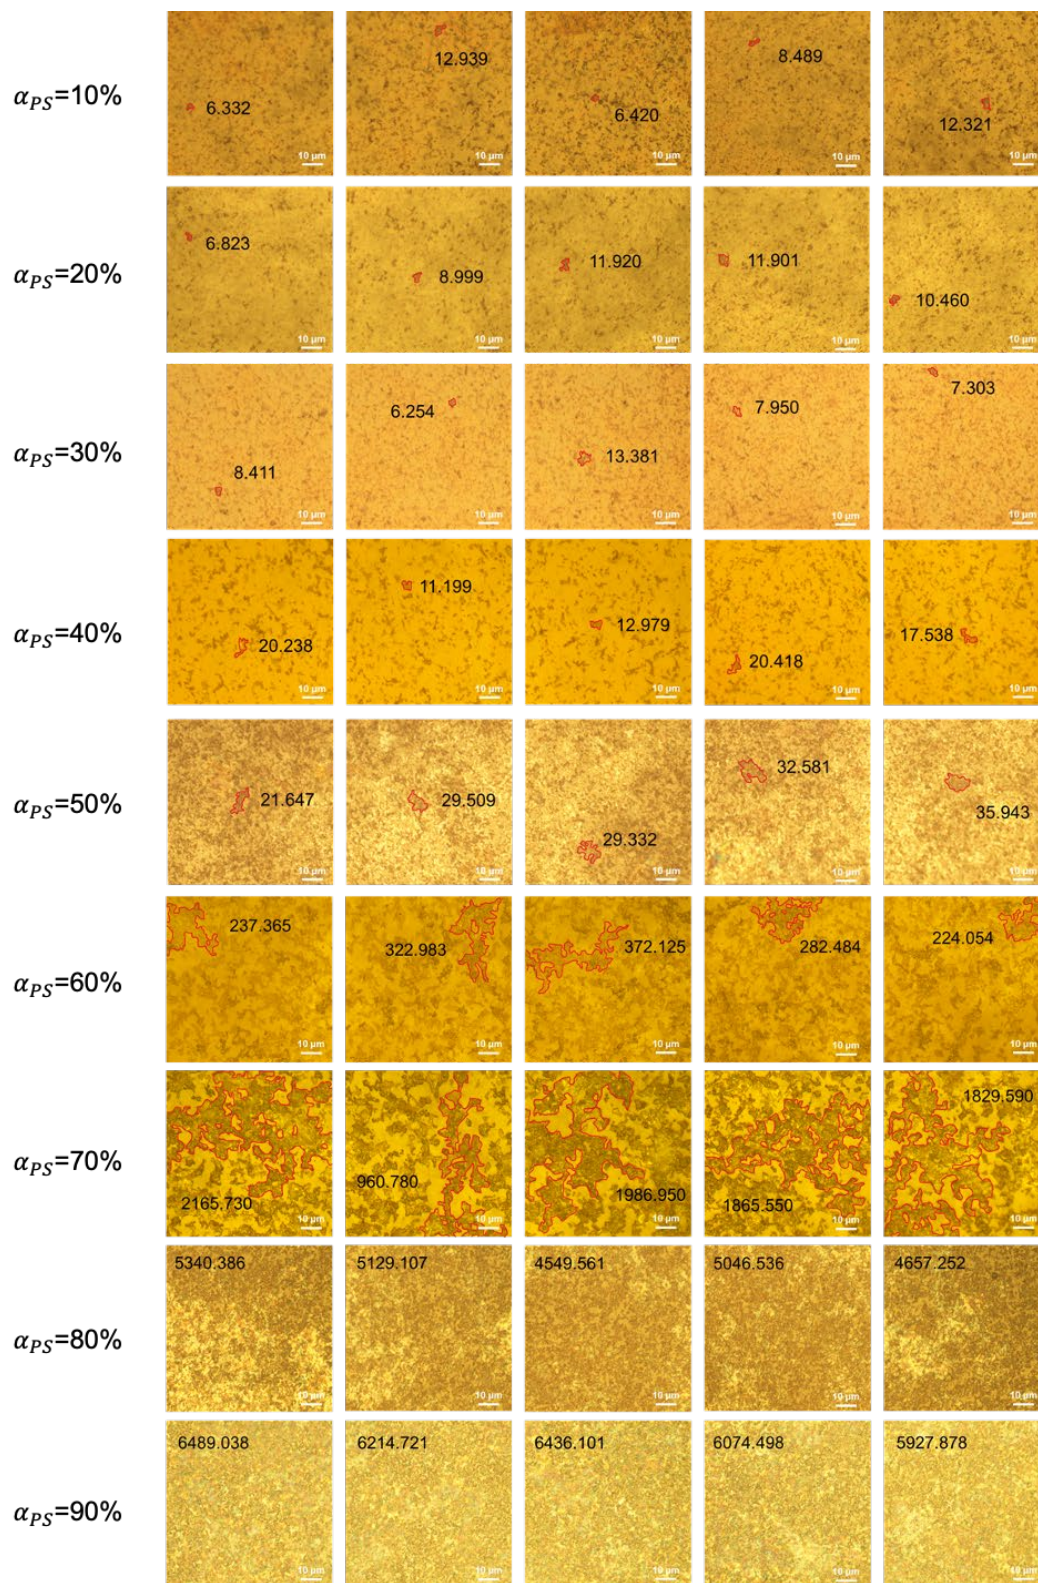

**Figure S8.** Statistic of maximum cluster area with different  $\alpha_{PS}$  .

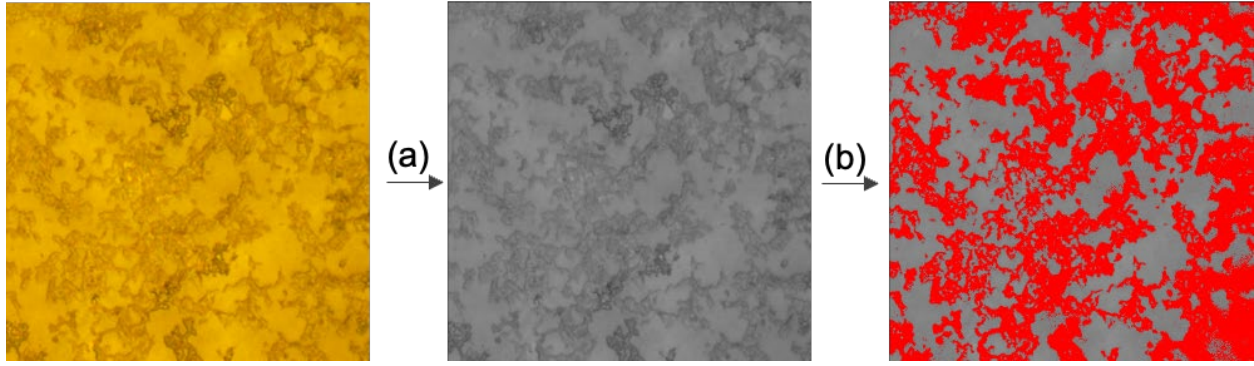

**Figure S9.** The method of the calculation of continuous phase ratio. (a) Change image into an 8-bit grayscale type. (b) Adjust threshold to select the phase separation area. The continuous phase ratio can be calculated:  $\alpha = \frac{S_{contineous\ phase\ area}}{S_{area}}$ .

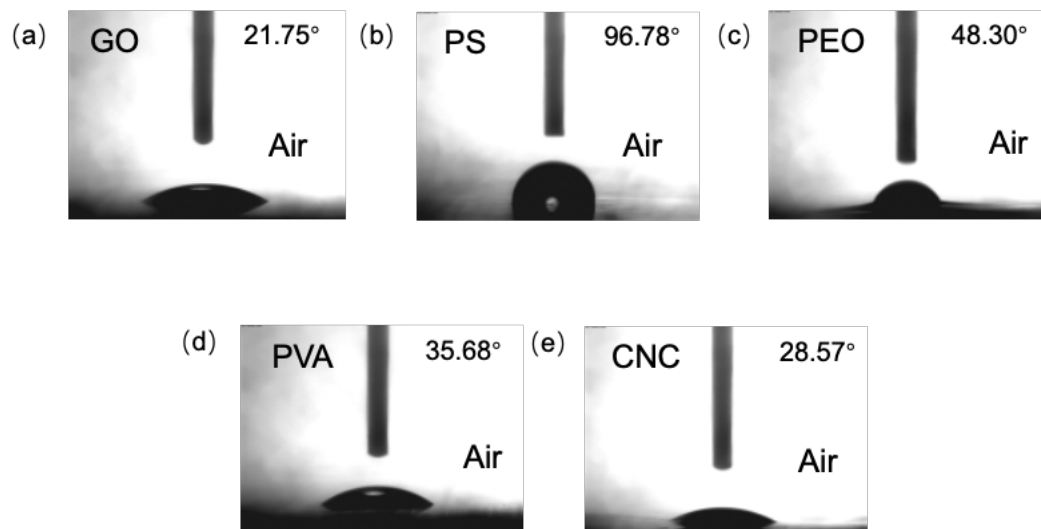

**Figure S10.** Water contact angle measurement of pure GO, PS, PEO, PVA and CNC.

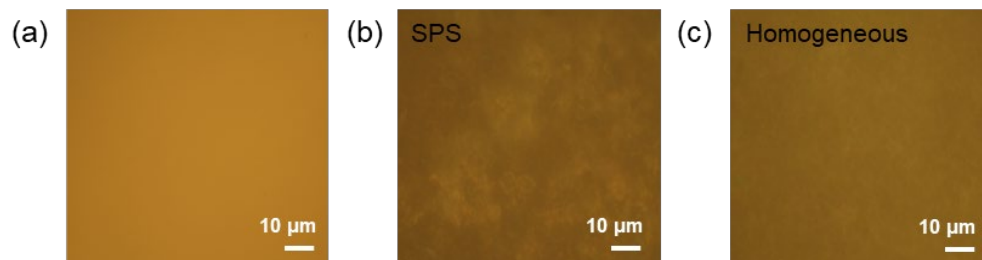

**Figure S11.** The OM image of (a) homogeneous solution, (b) after adding EA to generate SPS and (c) after adding EA/ ethanol to generate homogeneous aggregation for GO/PEO.

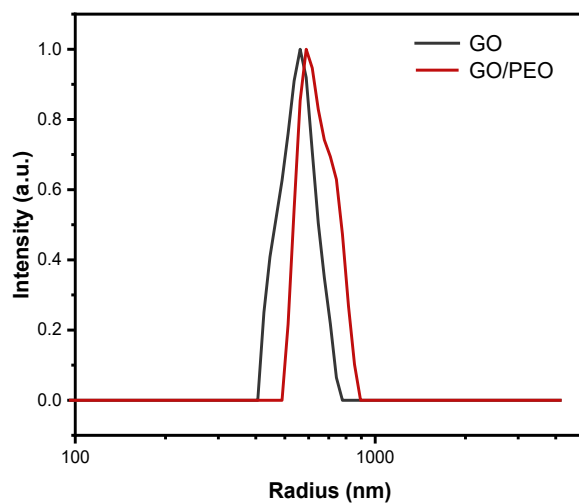

**Figure S12.** The DLS Intensity-Radius curve of pure GO solution and GO/PEO solution. The hydrodynamic radius of GO and GO/PEO is 562 nm and 588 nm.

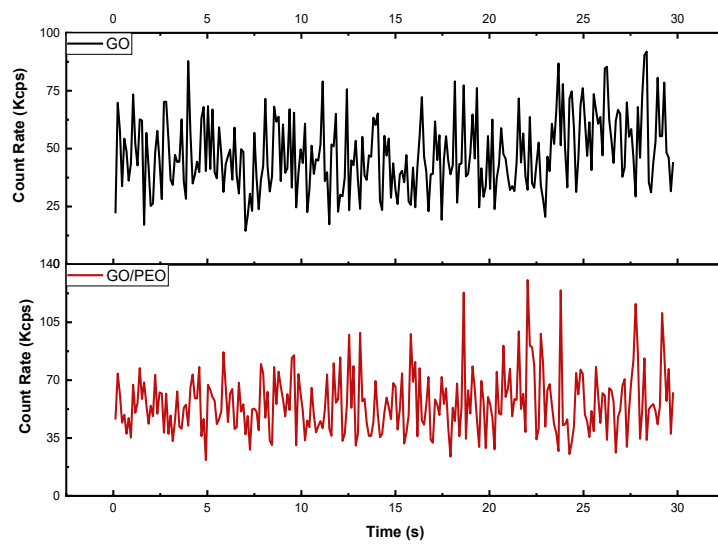

**Figure S13.** The DLS Count Rate-Time curve of pure GO solution and GO/PEO solution.



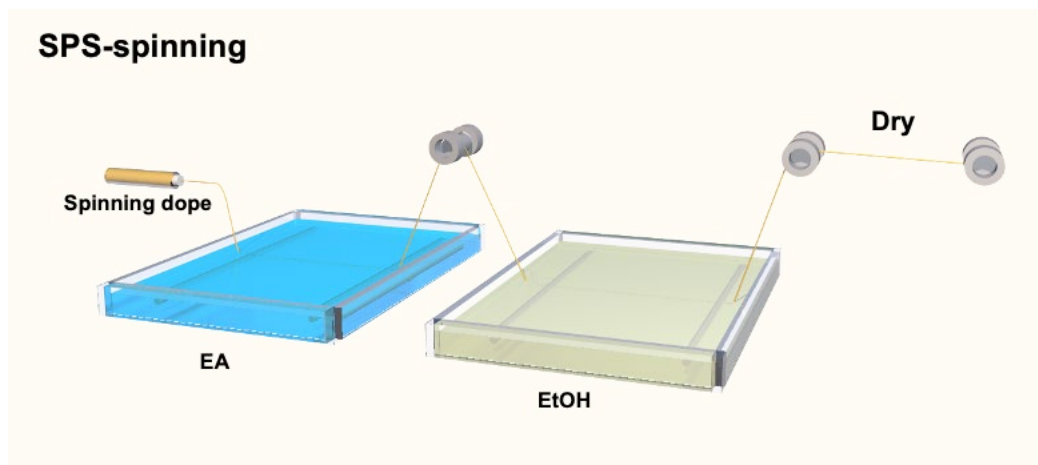

**Figure S14.** Scheme of the continuous SPS-spinning process.

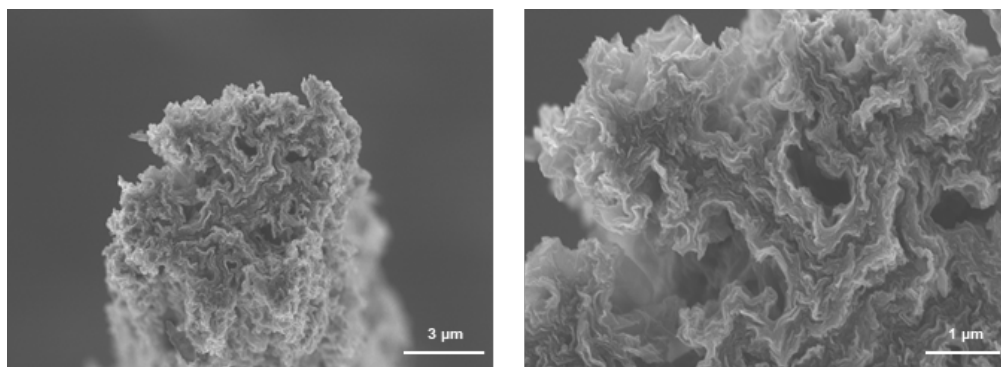

**Figure S15.** Fracture section of homogeneous GO/PEO fibers.

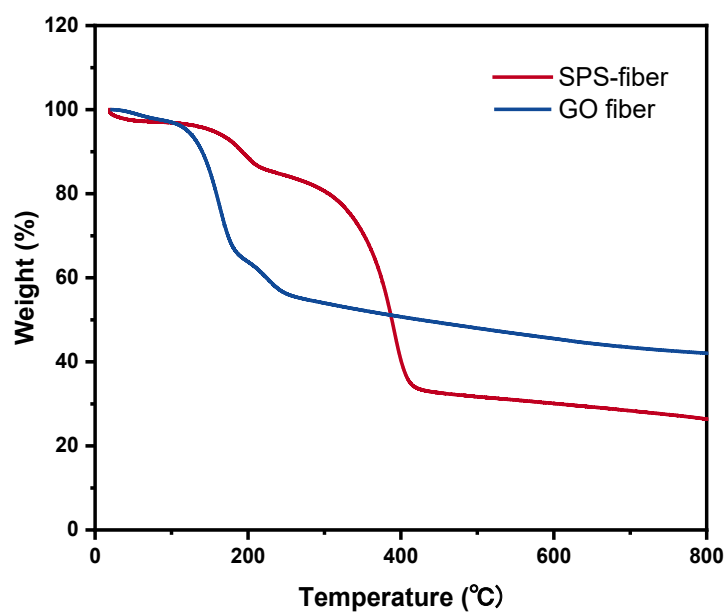

**Figure S16.** TGA of SPS fibers and GO fibers.

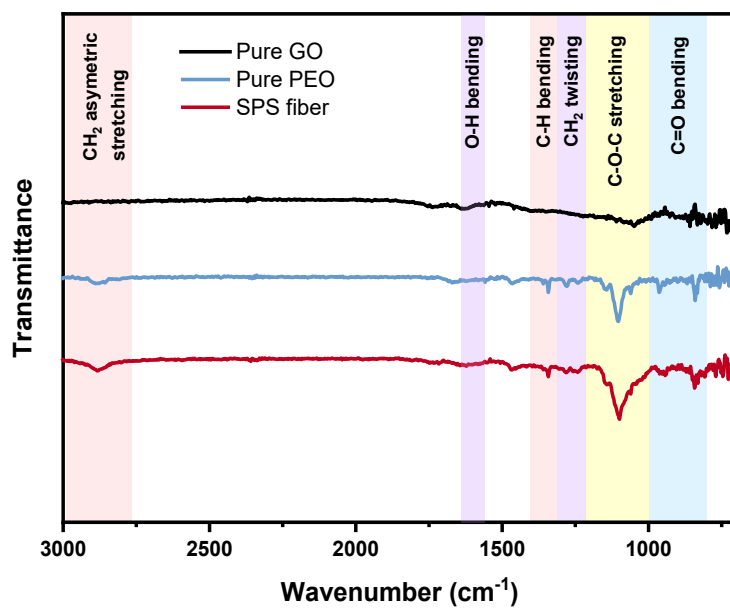

**Figure S17.** FTIR of pure GO, pure PEO and SPS fibers.

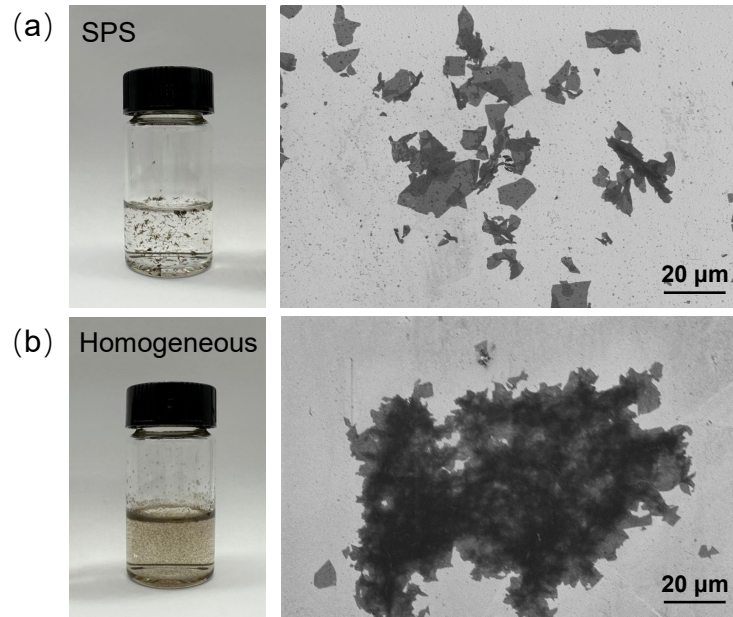

**Figure S18.** GO/PEO solution precipitated in EA and EA/ethanol. (a) Photo of GO/PEO solution precipitated in EA, followed by repeatedly washing by EA. The right panel is SEM image of the aggregated GO sheets. (b) Photo of GO/PEO solution precipitated in EA/ethanol, followed by repeatedly washing by EA/ethanol. The right panel is SEM image of the aggregated GO sheets with PEO.

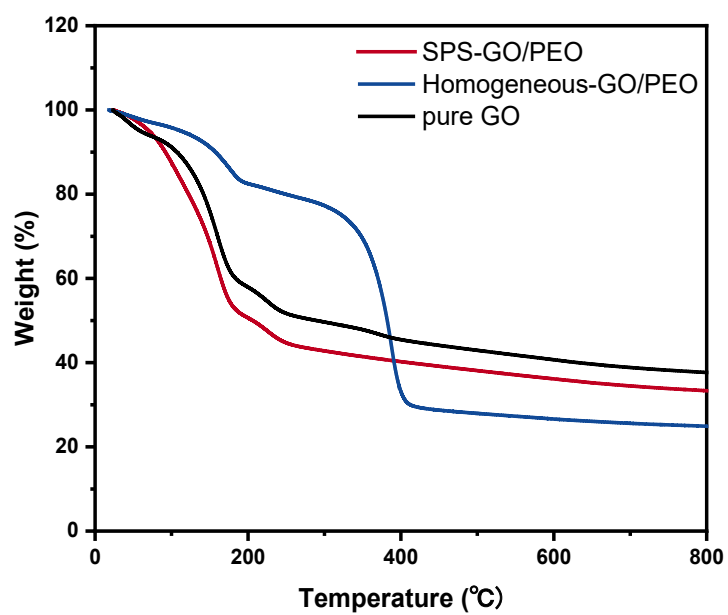

**Figure S19.** TGA of pure GO, SPS-GO/PEO and Homogeneous-GO/PEO.

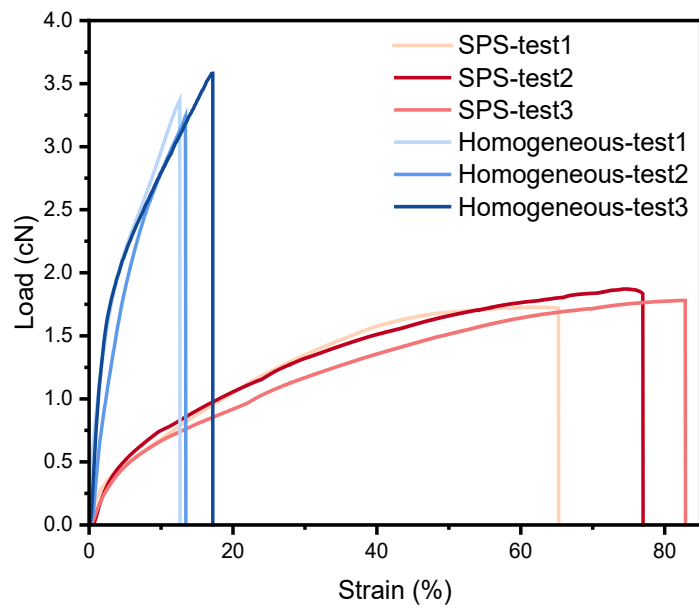

**Figure S20.** Tensile curves of homogenous GO/PEO fibers and the SPS fibers.

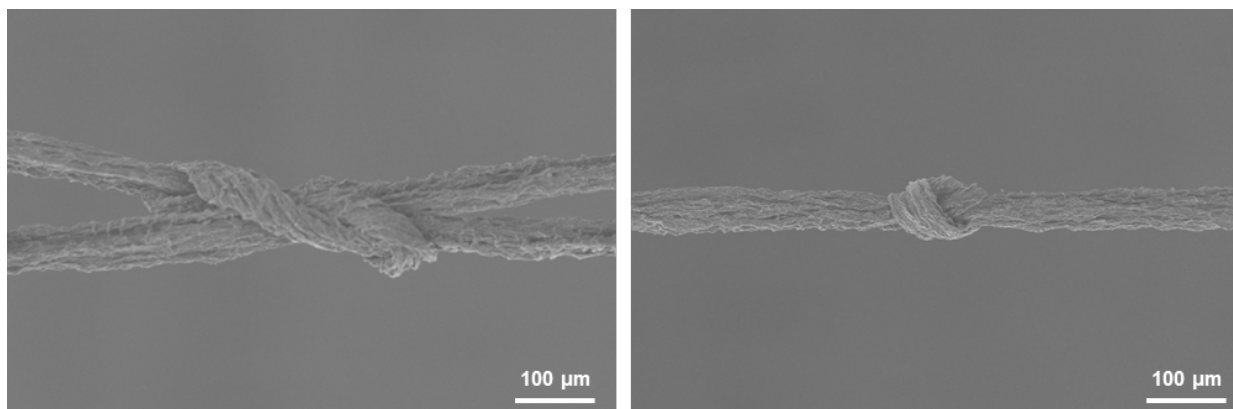

**Figure S21.** SEM images of SPS fibers with different type of knots.



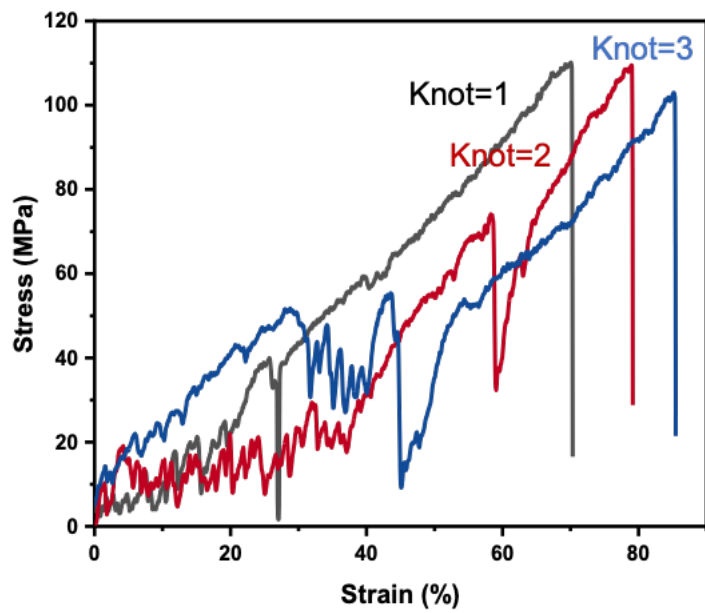

**Figure S22.** Stress-strain curves of SPS fibers with different numbers of knots.

**Table S1.** The contact angle difference between different polymers and pure GO.

|                    | <b>PS</b> | <b>PEO</b> | <b>PVA</b> | <b>CNC</b> |
|--------------------|-----------|------------|------------|------------|
| $\Delta\theta$ (°) | 75.03     | 26.55      | 13.92      | 6.82       |

**Table S2.** The raw data for mechanical testing of homogenous fibers and SPS fibers.

| <b>Sample</b>    | <b>Strain (%)</b> | <b>Load (cN)</b> |
|------------------|-------------------|------------------|
| SPS-test1        | 65.28             | 1.72729          |
| SPS-test2        | 76.96             | 1.87142          |
| SPS-test3        | 82.88             | 1.78035          |
| Homogenous-test1 | 12.64             | 3.36892          |
| Homogenous-test2 | 13.36             | 3.23955          |
| Homogenous-test3 | 17.16             | 3.58193          |
